# Supplementary material for: Hydrophilic modification of polyvinyl chloride with polyacrylic acid using ATRP
Source: Royal Society of Chemistry journal article supplement (doi:10.1039/d0ra05936f), 2020-01-01

## Supplementary Info

# Hydrophilic modification of polyvinyl chloride with polyacrylic acid using ATRP technique

Edina Rusen<sup>1</sup>, Raluca Șomoghi<sup>2</sup>, Cristina Busuioc<sup>1</sup>, Aurel Diacon<sup>1,\*</sup>

<sup>1</sup>University POLITEHNICA of Bucharest, Faculty of Applied Chemistry and Materials Science, Gh. Polizu Street 1-7, Bucharest, 011061, Romania.

<sup>2</sup>National Research and Development Institute for Chemistry and Petrochemistry – ICECHIM, 202 Splaiul Independenței, Bucharest, 060021, Romania.

\*Corresponding author email: [aurel\\_diacon@yahoo.com](mailto:aurel_diacon@yahoo.com); [aurel.diacon@upb.ro](mailto:aurel.diacon@upb.ro)

### 1. Grafting degree determination calculation using GPC results

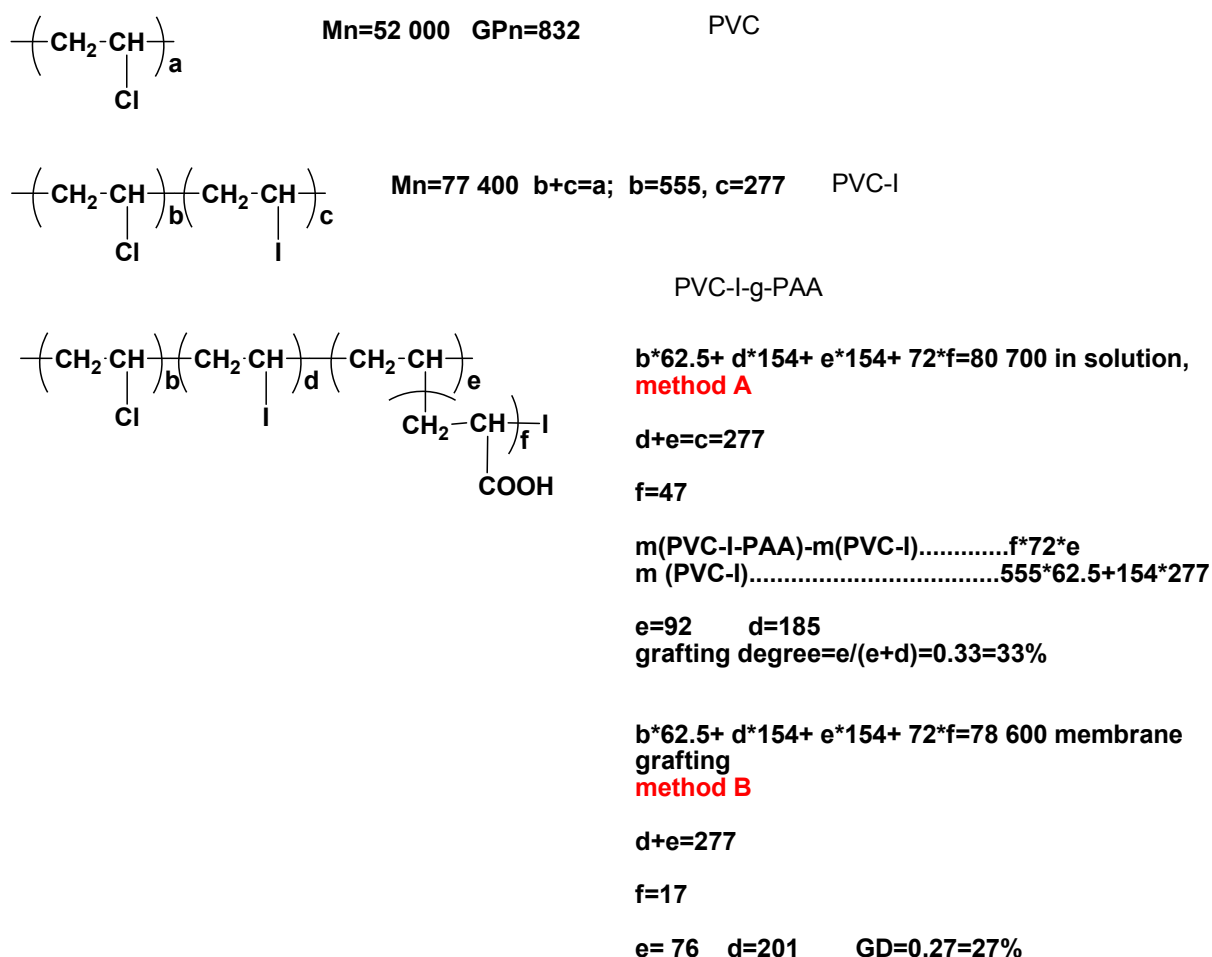

Supplement: d0ra05936f1.pdf [file d0ra05936f1.pdf]
